# Supplementary material for: Aerosol-cloud interactions in liquid-phase clouds under different meteorological and aerosol backgrounds
Source: Copernicus journal article supplement (doi:10.5194/egusphere-2024-3662), 2024-12-09
Supplement: Supplementary file 1 [file egusphere-2024-3662-supplement.pdf]

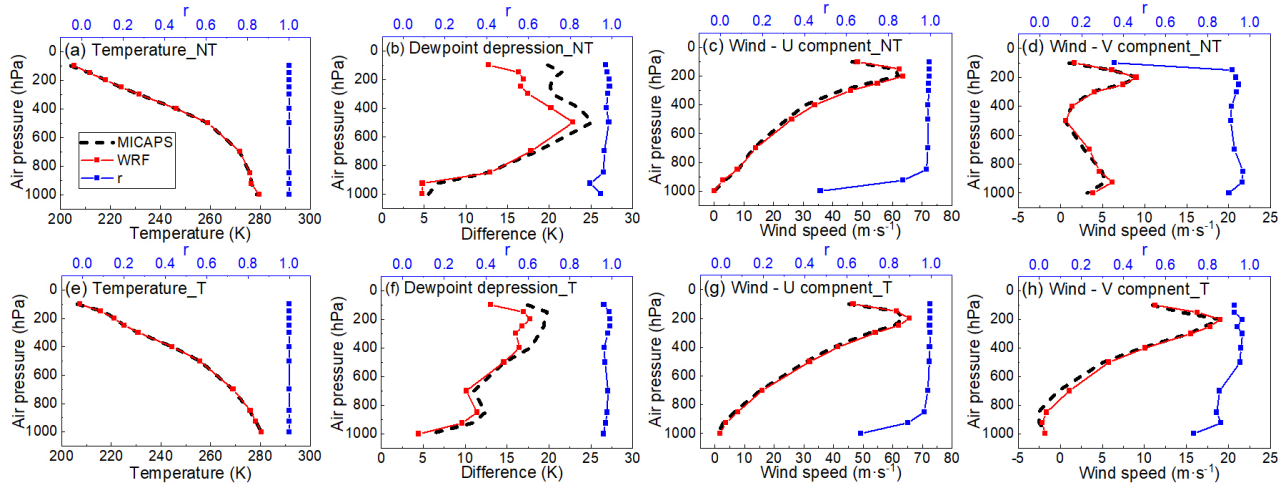

**Figure S1.** The vertical profiles of temperature (a and e), dewpoint depression (b and f), and the U (c and g) and V (d and h) wind components, averaged over the outer domain during NT (a-d) and T (e-h), are presented for both the WRF simulations (red lines for the Control experiment) and MICAPS (black lines), along with the spatial correlation between them at each vertical level (blue lines, upper axis).

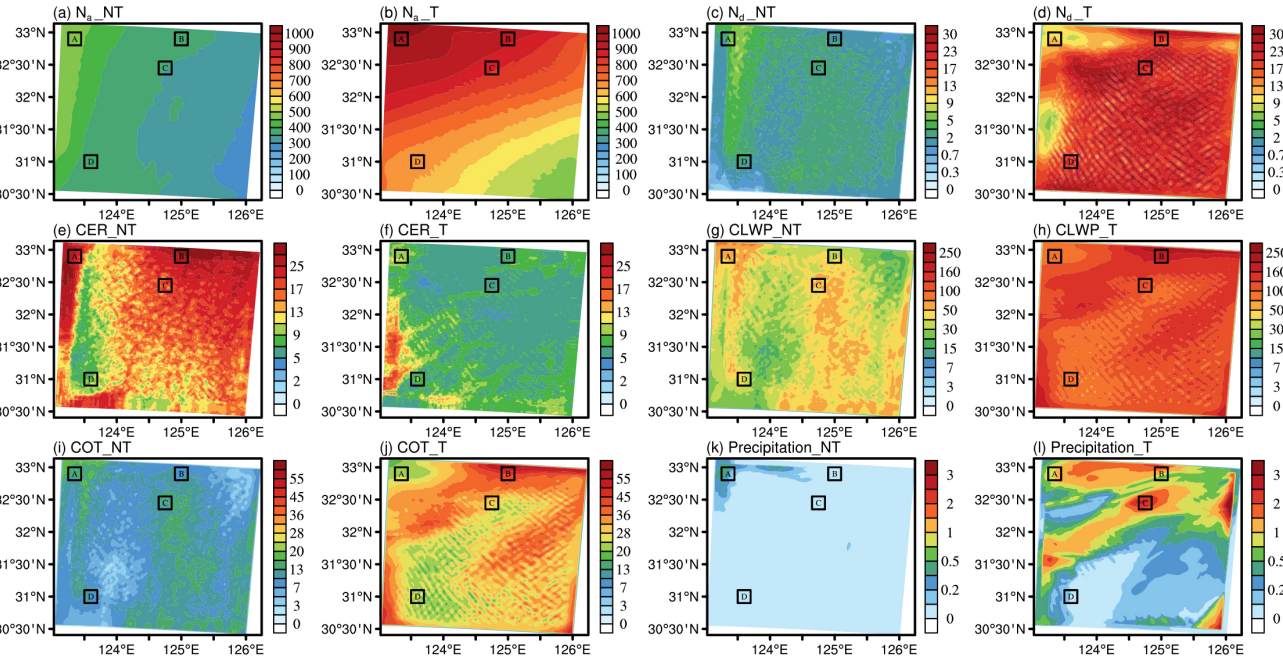

**Figure S2.** The distributions of  $N_a$  (a-b, in cm<sup>-3</sup>),  $N_d$  (c-d, in cm<sup>-3</sup>), CER (e-f, in  $\mu$ m), CLWP (g-h, in g·cm<sup>-2</sup>), COT (i-j), and accumulated precipitation (k-l, in mm) in ECO during NT and T.

**Table S1.** Explanations of acronyms used in this paper.

| Acronym  | Explanation                                   |
|----------|-----------------------------------------------|
| AOD      | Aerosol optical depth                         |
| CAM-chem | The Community Atmosphere Model with Chemistry |
| CCN      | Cloud condensation nuclei                     |
| CER      | Cloud droplet effective radius                |

|          |                                                                            |
|----------|----------------------------------------------------------------------------|
| CIWC     | Cloud ice water content                                                    |
| CLWC     | Cloud liquid water content                                                 |
| CLWP     | Cloud liquid water path                                                    |
| COT      | Cloud optical thickness                                                    |
| COTI     | Cloud optical thickness of ice                                             |
| COTW     | Cloud optical thickness of water                                           |
| EC       | Eastern China                                                              |
| ECO      | Eastern China's adjacent ocean                                             |
| IMERG    | The Integrated Multi-satellitE Retrievals for GPM                          |
| LTS      | Lower tropospheric stability                                               |
| MEGAN    | The Model of Emissions of Gases and Aerosols from Nature                   |
| MEIC     | The Multi-resolution Emission Inventory for China                          |
| MODIS    | The Moderate Resolution Imaging Spectrometer                               |
| MOSAIC   | The Model for Simulating Aerosol Interactions and Chemistry                |
| $N_a$    | Aerosol number concentration                                               |
| $N_d$    | Cloud droplet number concentration                                         |
| $N_r$    | Raindrops number concentration                                             |
| NCEP     | The National Center for Environmental Prediction                           |
| NMC      | The National Meteorological Center of China                                |
| NT       | The periods of EC aerosol non-transiting ECO                               |
| RH       | Relative humidity                                                          |
| RWC      | Rainwater content                                                          |
| RWP      | Rainwater path                                                             |
| SBM      | Spectral bin cloud microphysics                                            |
| T        | The periods of EC aerosol transiting ECO                                   |
| WRF-Chem | The online-chemistry version of the Weather Research and Forecasting model |

---
